# Supplementary material for: Cadmium Exposure and Cancer Mortality in a Prospective Cohort: The Strong Heart Study
Source: PubMed Central journal article supplement (PMC3984227; doi:10.1289/ehp.1306587), 2014-02-14
Supplement: ehp.1306587.s001.pdf [file ehp.1306587.s001.pdf]

**Supplemental Material**  
**Cadmium Exposure and Cancer Mortality in a Prospective  
Cohort: The Strong Heart Study**

Esther García-Esquinas, Marina Pollan, Maria Tellez-Plaza, Kevin A. Francesconi, Walter Goessler,  
Eliseo Guallar, Jason G. Umans, Jeunliang Yeh, Lyle G. Best, and Ana Navas-Acien.

**Supplemental Material, Table S1.** Hazard ratios (95%CI) for cancer mortality comparing the 80<sup>th</sup> vs. 20<sup>th</sup> percentile of U-Cd levels ( $\mu\text{g/L}$ ) without accounting for urine dilution (model A), adjusting for urine creatinine as a separate variable (model B) and dividing urine cadmium by urine creatinine (model C).

| <b>Cancer type</b>                  | <b>Cases/Total</b> | <b>Model A</b>    | <b>Model B</b>    | <b>Model C<sup>a</sup></b> |
|-------------------------------------|--------------------|-------------------|-------------------|----------------------------|
| Total cancer                        | 375/3,792          | 1.11 (0.93, 1.33) | 1.37 (1.10, 1.70) | 1.30 (1.09, 1.55)          |
| Smoking related cancers             | 210/3,792          | 1.25 (0.99, 1.59) | 1.78 (1.35, 2.35) | 1.56 (1.24, 1.96)          |
| Esophagus/Stomach cancer            | 24/3,792           | 0.95 (0.46, 1.94) | 0.68 (0.28, 1.68) | 0.68 (0.34, 1.38)          |
| Colon/Rectal cancer                 | 32/3,792           | 0.86 (0.46, 1.60) | 0.84 (0.38, 1.88) | 0.98 (0.51, 1.88)          |
| Liver/Intrahepatic bile ducts       | 21/3,792           | 0.93 (0.44, 1.96) | 1.50 (0.64, 3.51) | 1.64 (0.81, 3.13)          |
| Gallbladder/Extrahepatic bile ducts | 11/3,792           | 1.07 (0.36, 3.16) | 1.00 (0.26, 3.88) | 0.89 (0.31, 2.54)          |
| Pancreas                            | 24/3,792           | 1.34 (0.66, 2.74) | 2.62 (1.26, 5.44) | 2.40 (1.39, 4.17)          |
| Bronchus/Lung                       | 77/3,792           | 1.62 (1.07, 2.46) | 3.27 (2.13, 5.03) | 2.27 (1.58, 3.27)          |
| Breast                              | 25/2,254           | 1.02 (0.52, 1.99) | 0.98 (0.42, 2.30) | 1.02 (0.50, 2.07)          |
| Prostate                            | 16/1,538           | 1.01 (0.38, 2.69) | 1.18 (0.31, 4.47) | 0.42 (0.16, 1.08)          |
| Kidney                              | 26/3,792           | 1.24 (0.62, 2.48) | 1.21 (0.52, 2.82) | 1.15 (0.58, 2.31)          |
| Lymphohematopoietic tissue          | 37/3,792           | 0.83 (0.46, 1.47) | 0.97 (0.47, 2.04) | 1.40 (0.80, 2.43)          |

<sup>a</sup> Model C corresponds to Model 2 in Table 3.

All models are adjusted for sex, age, smoking status, pack-years and BMI, and account for age by using age as the time scale and age at baseline examination treated as staggered entries.
